# Supplementary material for: The expression, immune infiltration, prognosis, and experimental validation of OSBPL family genes in liver cancer
Source: Springer Nature journal article supplement (doi:10.1186/s12885-023-10713-9), 2023-03-14
Supplement: MOESM1 [file 24623056]

First and  
Second

250kDa  
130kDa  
100kDa  
70kDa  
55kDa  
35kDa  
25kDa  
15kDa

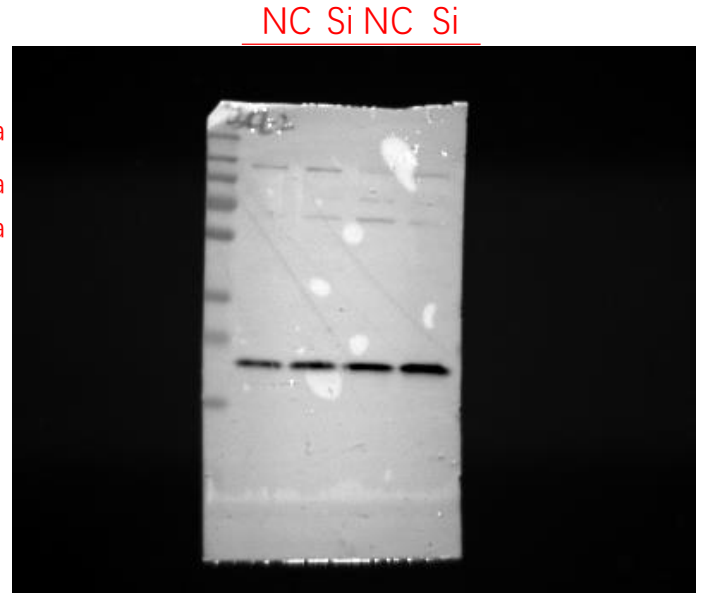

Third and  
Fourth

250kDa  
130kDa  
100kDa  
70kDa  
55kDa  
35kDa  
25kDa  
15kDa

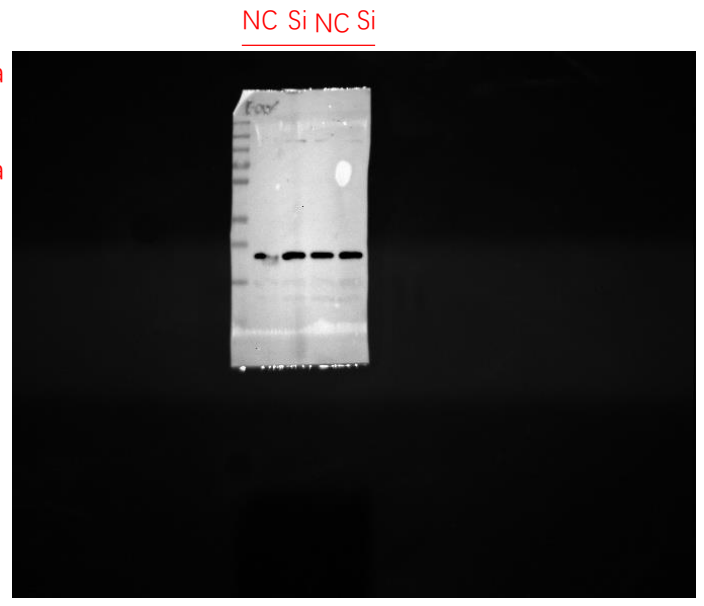

First and Second

250kDa  
130kDa  
100kDa  
70kDa  
55kDa  
35kDa  
25kDa

NC Si NC Si

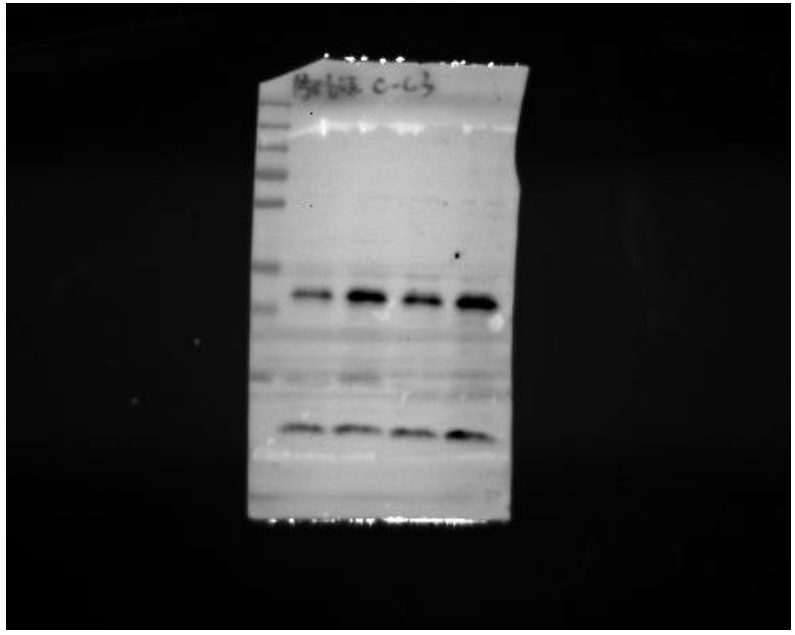

Caspase3  
Cleaved-Caspase3

Third and Fourth

250kDa  
130kDa  
100kDa  
70kDa  
55kDa  
35kDa  
25kDa  
15kDa

NC Si NC Si

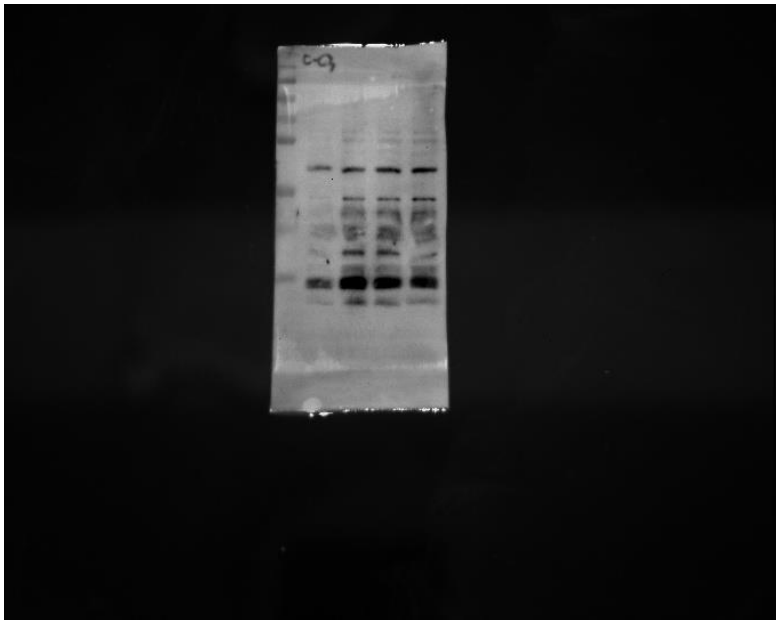

Caspase3  
Cleaved-Caspase3

First and Second

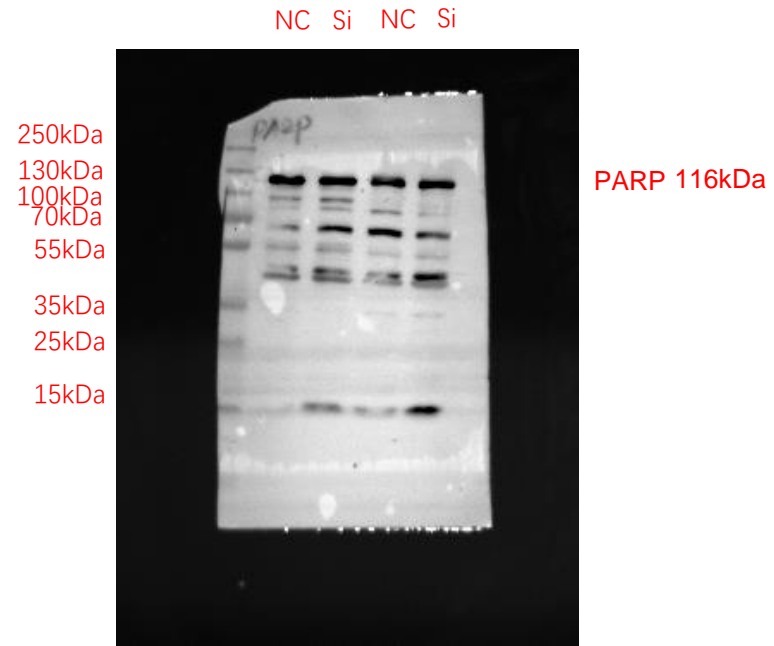

Third and Fourth

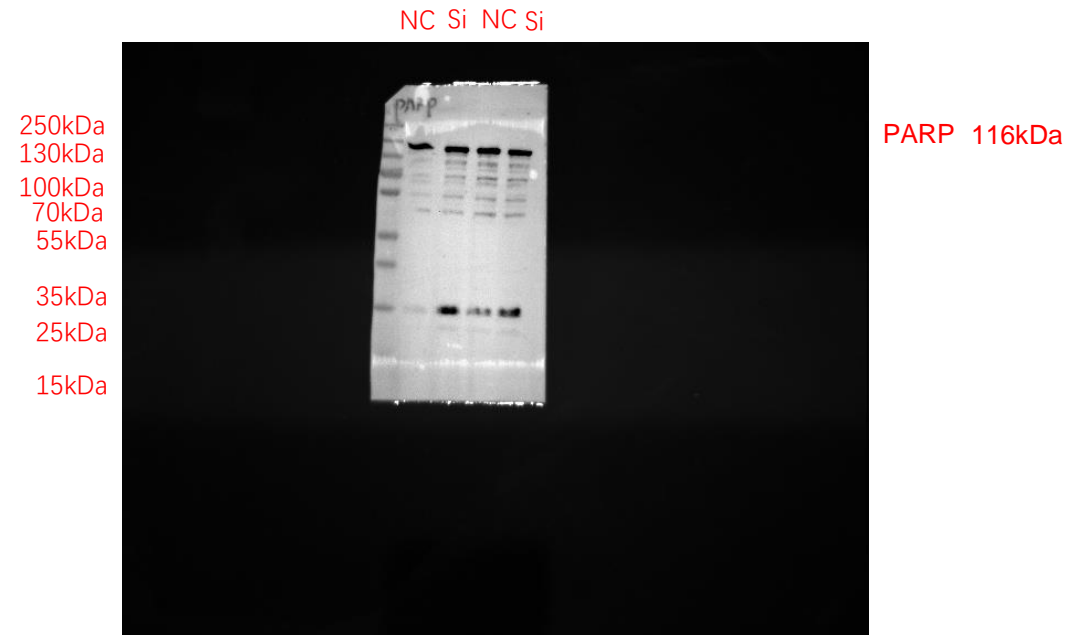

## First and Second

NC Si NC Si

250kDa  
130kDa  
100kDa  
70kDa  
55kDa  
35kDa  
25kDa  
15kDa

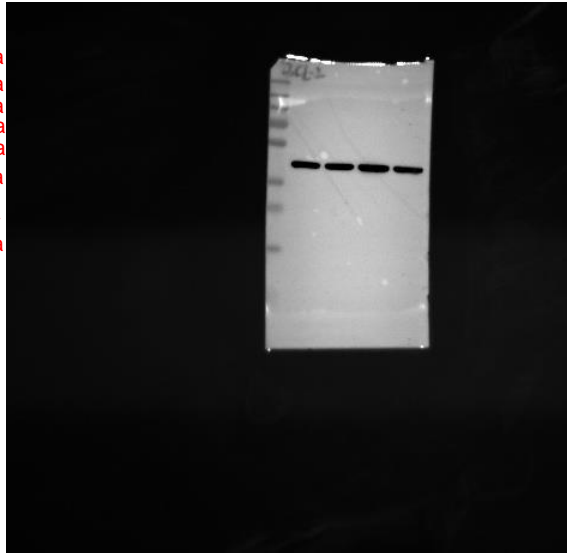

$\beta$ -actin, 42kDa

NC Si NC Si

250kDa  
130kDa  
100kDa  
70kDa  
55kDa  
35kDa  
25kDa  
15kDa

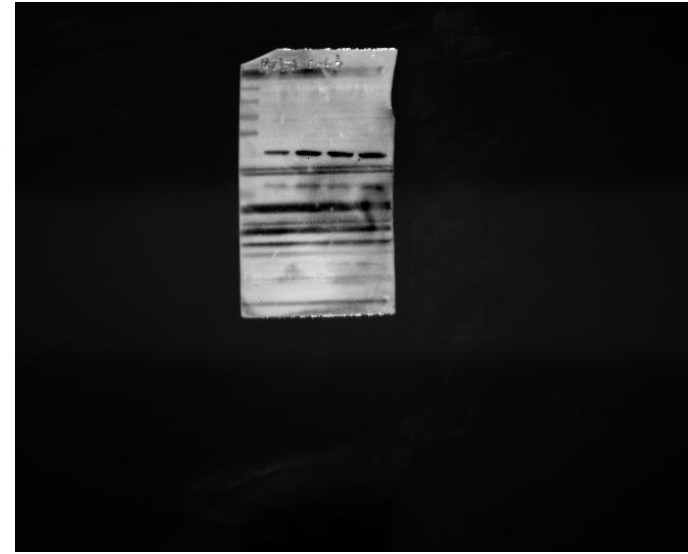

$\beta$ -actin, 42kDa

## Third and Fourth

NC Si NC Si

250kDa  
130kDa  
100kDa  
70kDa  
55kDa  
35kDa  
25kDa  
15kDa

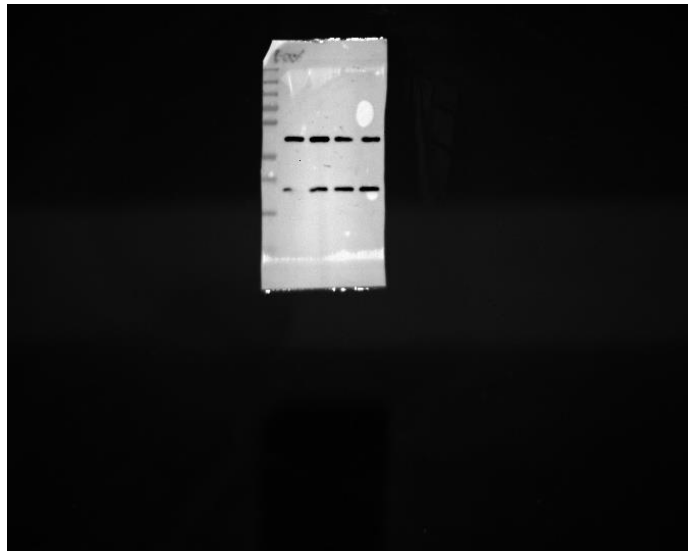

$\beta$ -actin, 42kDa

NC Si NC Si

250kDa  
130kDa  
100kDa  
70kDa  
55kDa  
35kDa  
25kDa  
15kDa

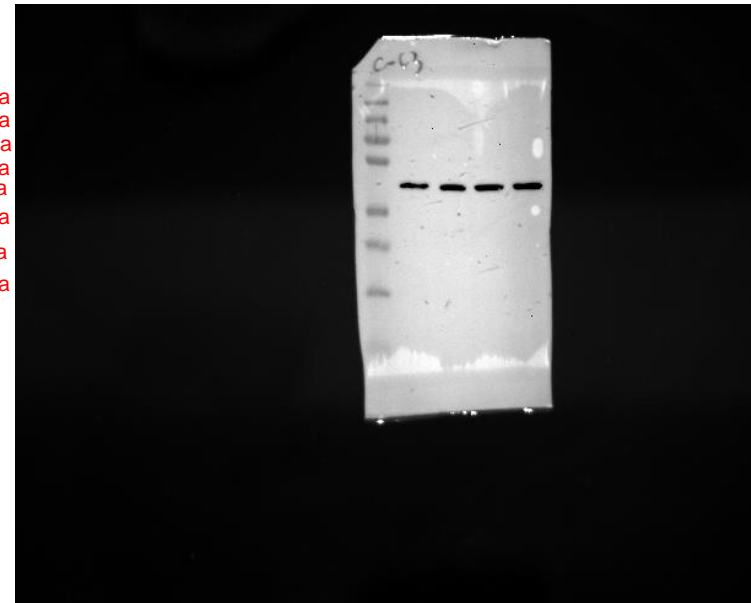

$\beta$ -actin, 42kDa
